# Supplementary material
Source: HighWire-hosted journal article supplement (http://www.ajnr.org/highwire/filestream/86767/field_highwire_adjunct_files/0/20-00496.pdf)
Supplement: 20-00496.pdf [file 20-00496.pdf]

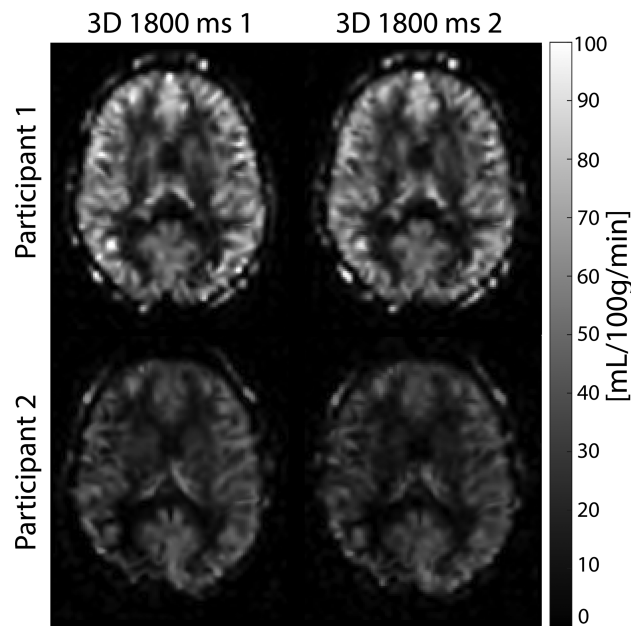

**ONLINE FIGURE.** Representative CBF maps of intrasession repeated 3D 1800 ms scans of a 35-year-old female volunteer (participant 1) and a 73-year-old female volunteer (participant 2).

**Online Table 1: Participant distribution over different subgroups**

|                                  | No. of Participants |       |         |       | Total | Age (Mean $\pm$ SD)<br>(yr) |
|----------------------------------|---------------------|-------|---------|-------|-------|-----------------------------|
|                                  | Men                 |       | Women   |       |       |                             |
|                                  | Younger             | Older | Younger | Older |       |                             |
| All participants                 | 3                   | 17    | 4       | 10    | 34    | 58 $\pm$ 17                 |
| Field strength<br>(intrasession) |                     |       |         |       |       |                             |
| 3T                               | 2                   | 8     | 4       | 6     | 20    | 56 $\pm$ 20                 |
| 1.5T                             | 1                   | 9     | 0       | 4     | 14    | 62 $\pm$ 12                 |
| Field strength<br>(intersession) |                     |       |         |       |       |                             |
| 1.5T–1.5T                        | 0                   | 4     | 0       | 2     | 6     | 66 $\pm$ 6                  |
| 1.5T–3T                          | 1                   | 5     | 2       | 6     | 14    | 57 $\pm$ 16                 |
| 3T–3T                            | 2                   | 8     | 2       | 2     | 14    | 56 $\pm$ 20                 |
| Age                              |                     |       |         |       |       |                             |
| Younger                          | 3                   | NA    | 4       | NA    | 7     | 28 $\pm$ 4                  |
| Older                            | NA                  | 17    | NA      | 10    | 27    | 66 $\pm$ 8                  |

**Note:**—NA indicates not applicable (there are no younger participants in the older group). Younger was defined as <35 years and older as >35 years.

Online Table 2: Imaging parameters of the different scans acquired in one session<sup>a</sup>

| Sequence No. | General Parameters |                   |              |              |                    |                  |                       |                 |               |           | 1.5T            |                  |                       |                 | 3T            |        |  |  |
|--------------|--------------------|-------------------|--------------|--------------|--------------------|------------------|-----------------------|-----------------|---------------|-----------|-----------------|------------------|-----------------------|-----------------|---------------|--------|--|--|
|              | Sequence           | PLD (ms)          | Readout Type | EPI Segments | Resolution (mm)    | Shot Length (ms) | Dynamic Scan Time (s) | No. of Dynamics | Scan Time (s) | Matrix    | Resolution (mm) | Shot Length (ms) | Dynamic Scan Time (s) | No. of Dynamics | Scan Time (s) | Matrix |  |  |
| 1            | 3D T1WI (MPRAGE)   | NA                | TFE          | NA           | 1 × 1 × 1          | NA               | NA                    | NA              | 386           | 240 × 240 | 1 × 1 × 1       | NA               | NA                    | NA              | 240 × 240     |        |  |  |
| 2            | 3D 1800ms run1     | 1800              | GraSE        | 4            | 3.75 × 3.75 × 8.00 | 300              | 32.0                  | 9               | 312           | 64 × 60   | 3.75 × 3.75 × 6 | 300              | 32.8                  | 8               | 64 × 60       |        |  |  |
| 3            | 2D 1800ms run1     | 1800 <sup>b</sup> | EPI          | 1            | 3.75 × 3.75 × 7.00 | 25               | 8.2                   | 30              | 254           | 64 × 60   | 3.75 × 3.75 × 5 | 25               | 8.4                   | 30              | 64 × 62       |        |  |  |
| 4            | 3D 1800ms run2     | 1800              | GraSE        | 4            | 3.75 × 3.75 × 8.00 | 300              | 32.0                  | 9               | 312           | 64 × 60   | 3.75 × 3.75 × 6 | 300              | 32.8                  | 8               | 64 × 60       |        |  |  |
| 5            | 2D 1800ms run2     | 1800 <sup>b</sup> | EPI          | 1            | 3.75 × 3.75 × 7.00 | 25               | 8.2                   | 30              | 254           | 64 × 60   | 3.75 × 3.75 × 5 | 25               | 8.4                   | 30              | 64 × 62       |        |  |  |
| 6            | 3D 1600ms          | 1600              | GraSE        | 4            | 3.75 × 3.75 × 8.00 | 300              | 32.0                  | 9               | 312           | 64 × 60   | 3.75 × 3.75 × 6 | 300              | 32.0                  | 8               | 64 × 60       |        |  |  |
| 7            | 3D 2000ms          | 2000              | GraSE        | 4            | 3.75 × 3.75 × 8.00 | 300              | 33.6                  | 9               | 328           | 64 × 60   | 3.75 × 3.75 × 6 | 300              | 34.4                  | 8               | 64 × 60       |        |  |  |
| 8            | 3D 1800ms HR       | 1800              | GraSE        | 10           | 2.75 × 2.75 × 6.00 | 154              | 123.2                 | 3               | 393           | 88 × 80   | 2.75 × 2.75 × 6 | 171              | 38.4                  | 3               | 88 × 84       |        |  |  |

**Note:**—HR indicates high-resolution; TFE, turbo field echo; NA, not applicable.

<sup>a</sup> One dynamic consists of one label and one control image. Moreover, one dynamic is devoted to the acquisition of a pair of M0 images; the M0 images are acquired with the same TR as the label/control pairs.

<sup>b</sup> The 2D-EPI scan has a PLD of 1800ms, increasing for each imaging slice resulting in a PLD of 2140ms for the last slice. This effect is taken into account during CBF quantification.

**Online Table 3: Results from Shapiro-Wilk normality test on GM and WB CBF data with and without PVC and spatial CoV data without PVC<sup>a</sup>**

| Scan          | Field Strength | GM CBF                     |               | WB CBF                     |                            | Spatial CoV   |
|---------------|----------------|----------------------------|---------------|----------------------------|----------------------------|---------------|
|               |                | No PVC                     | PVC           | No PVC                     | PVC                        | No PVC        |
| 3D 1800 ms    | 1.5T           | 0.918 (0.203)              | 0.934 (0.344) | 0.896 (0.100)              | 0.944 (0.471)              | 0.963 (0.776) |
|               | 3T             | 0.911 (0.068)              | 0.933 (0.176) | 0.897 (0.036) <sup>b</sup> | 0.916 (0.083)              | 0.952 (0.391) |
| 2D 1800 ms    | 1.5T           | 0.885 (0.069)              | 0.892 (0.086) | 0.923 (0.243)              | 0.913 (0.173)              | 0.957 (0.680) |
|               | 3T             | 0.916 (0.082)              | 0.932 (0.166) | 0.894 (0.032) <sup>b</sup> | 0.923 (0.114)              | 0.956 (0.464) |
| 3D 1600 ms    | 1.5T           | 0.971 (0.890)              | 0.977 (0.950) | 0.960 (0.716)              | 0.980 (0.974)              | 0.931 (0.313) |
|               | 3T             | 0.889 (0.026) <sup>b</sup> | 0.906 (0.054) | 0.858 (0.007) <sup>b</sup> | 0.896 (0.035) <sup>b</sup> | 0.930 (0.155) |
| 3D 2000 ms    | 1.5T           | 0.952 (0.591)              | 0.930 (0.307) | 0.968 (0.843)              | 0.921 (0.227)              | 0.928 (0.290) |
|               | 3T             | 0.931 (0.160)              | 0.945 (0.296) | 0.890 (0.027) <sup>b</sup> | 0.932 (0.167)              | 0.980 (0.939) |
| 3D 1800 ms HR | 3T             | 0.903 (0.065)              | 0.904 (0.068) | 0.922 (0.143)              | 0.886 (0.033) <sup>b</sup> | 0.916 (0.112) |

**Note:**—HR indicates high-resolution.

<sup>a</sup>Data are W statistics with *P*-values W(*P*).

<sup>b</sup>Non-normally distributed (*P* < .05).
